# Supplementary material
Source: publisher site journal article supplement (https://www.dovepress.com/article/supplementary_file/622464/622464%20Revised%20Supplementary%20Material.docx)
Supplement: Supplementary file 1 [file 622464%20Revised%20Supplementary%20Material.docx]

# Supplementary figures

**
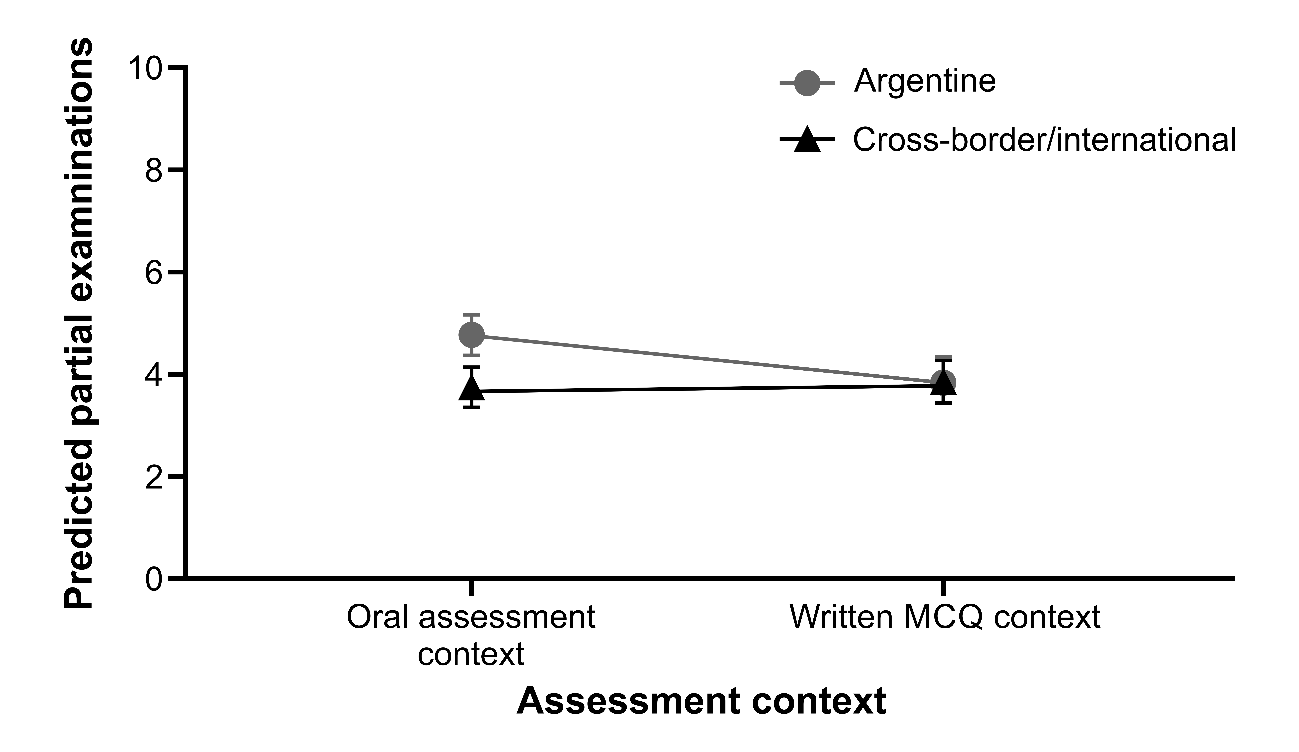
**

## **Supplementary Figure S1.**

Predicted marginal means for partial examination scores by nationality and assessment context.Predicted scores were estimated from the exploratory mixed-effects model including vigor, nationality, assessment context, and the nationality-by-assessment-context interaction, with a random intercept for student. Error bars indicate 95% confidence intervals. Assessment context was structurally linked to subject content and evaluative conditions; therefore, this figure should be interpreted as an exploratory visualization rather than as evidence of an independent assessment-format effect.

# Supplementary tables

## Supplementary Table S1: Operational definitions and measurement of study variables

| **Variable** | **Conceptual definition** | **Operational definition** | **Measurement / Source** | **Categories / Coding** | **Range / scale** |
| --- | --- | --- | --- | --- | --- |
| **Vigor (UWES-9S)** | Energy, persistence, and mental resilience in academic activities | Mean score of items VI1–VI3 from UWES-9S | Self-administered questionnaire | Continuous | 0–6 Likert scale |
| **Dedication (UWES-9S)** | Sense of significance, enthusiasm, and inspiration toward studies | Mean score of items DE1–DE3 | Self-administered questionnaire | Continuous | 0–6 Likert scale |
| **Absorption (UWES-9S)** | Full concentration and immersion in academic tasks | Mean score of items AB1–AB3 | Self-administered questionnaire | Continuous | 0–6 Likert scale |
| **Academic engagement (UWES-9S) (total)** | Overall level of engagement in academic activities | Mean of all 9 UWES items | Self-administered questionnaire | Continuous | 0–6 Likert scale |
| **Nationality** | Student’s country of origin | Self-reported country categorized into Argentine or cross-border/international | Questionnaire | Dichotomous nominal variable | Argentine; cross-border/international |
| **Country-of-origin-based linguistic proxy** | Exposure to Spanish as primary language | Derived from country of origin | Questionnaire | Dichotomous nominal variable | Spanish-speaking country-of-origin proxy; non-Spanish-speaking country-of-origin proxy |
| **Living arrangements** | Student’s cohabitation context | Self-reported living situation | Questionnaire | Four-category nominal variable | 1 = Living alone; 2 = Living with friends; 3 = Living with partner and/or own children; 4 = Living with family of origin |
| **Maternal education** | Highest educational level attained by the student's mother | Self-reported highest level of formal education completed by the mother | Questionnaire | Original ordinal educational level; dichotomized for selected analyses | 0 = No higher education; 1 = Higher education |
| **Paternal education** | Highest educational level attained by the student's father | Self-reported highest level of formal education completed by the father | Questionnaire | Original ordinal educational level; dichotomized descriptively | 0 = No higher education; 1 = Higher education |
| **Academic performance (PR_mean)** | Performance in course partial examinations | Mean of partial and retake exam scores across subjects | Institutional records | Continuous | 0–10 examination score scale |
| **Academic performance (F_mean_total)** | Performance in final examinations | Mean of final exam scores across subjects | Institutional records | Continuous | 0–10 examination score scale |
| **Approval (pass/fail)** | Academic success threshold | Dichotomized exam outcome | Institutional records | Binary outcome | 0 = Fail; 1 = Pass |
| **Subject (Materia)** | Course in which performance is evaluated | Categorical variable identifying subject | Institutional records | Three-category nominal variable | 1 = Embryology; 2 = Histology; 3 = Molecular Biology and Genetics |
| **Assessment context** | Assessment modality within the observed curricular context | Derived from actual subject-specific examination format and exam type | Institutional records | Contextual variable | Oral partial examination; written MCQ partial examination; written open-ended final examination |
| **Student ID (Rta_Num)** | Individual-level identifier | Unique code assigned to each participant | Dataset | Used as random effect in mixed models | No substantive range |

## Supplementary Table S2: Associations between academic engagement dimensions (vigor, dedication, and absorption) and academic outcomes

| **Predictor** | **Outcome** | **Model** | **Estimate or OR (95% CI)** | **p-value** |
| --- | --- | --- | --- | --- |
| **Vigor (per unit increase)** | Partial examination score | Linear regression | 0.13 (-0.01 to 0.28) | 0.073 |
| **Dedication (per unit increase)** | Partial examination score | Linear regression | 0.15 (-0.04 to 0.34) | 0.116 |
| **Absorption (per unit increase)** | Partial examination score | Linear regression | 0.16 (0.00 to 0.33) | 0.051 |
| **Vigor (per unit increase)** | Passing partial examination | Logistic regression | 1.15 (1.01 to 1.30) | 0.031 |
| **Dedication (per unit increase)** | Passing partial examination | Logistic regression | 1.17 (1.00 to 1.38) | 0.053 |
| **Absorption (per unit increase)** | Passing partial examination | Logistic regression | 1.14 (0.99 to 1.31) | 0.069 |

**Notes:** Linear regression estimates represent the change in partial examination score per one-unit increase in the corresponding engagement dimension. Logistic regression estimates are odds ratios for passing a partial examination per one-unit increase in the corresponding engagement dimension. Each engagement dimension was analyzed in a separate model.

## Supplementary Table S3: Missing data patterns for sociodemographic, engagement, and academic performance variables

| **Variable** | **Missing n (%)** |
| --- | --- |
| **Age** | 1 (0.4%) |
| **Gender** | 1 (0.4%) |
| **Nationality** | 0 (0.0%) |
| **Living arrangements** | 1 (0.4%) |
| **Maternal education** | 2 (0.8%) |
| **Paternal education** | 5 (1.9%) |
| **Vigor** | 0 (0.0%) |
| **Dedication** | 0 (0.0%) |
| **Absorption** | 0 (0.0%) |
| **Overall engagement** | 0 (0.0%) |
| **Partial examination average** | 30 (11.7%) |
| **Final examination average** | 133 (51.8%) |

## Supplementary Table S4: Characteristics of students with and without final examination data

| **Variable** | **Category** | **No final examination data**  **(n = 133)** | **Final examination data available**  **(n = 124)** |
| --- | --- | --- | --- |
| **Age, years** |  | 26.11 (8.10) | 21.98 (4.52) |
| **Vigor, 0-6 scale** |  | 3.34 (1.51) | 3.85 (1.25) |
| **Dedication, 0-6 scale** |  | 4.91 (1.28) | 5.19 (0.97) |
| **Absorption, 0-6 scale** |  | 4.01 (1.43) | 4.49 (1.10) |
| **Overall academic engagement, 0-6 scale** |  | 4.08 (1.28) | 4.51 (0.96) |
| **Partial examination average, 0-10 scale** |  | 2.38 (1.16) | 5.11 (1.79) |
| **Nationality** | Argentine | 55 (41.4%) | 69 (55.6%) |
| Cross-border/international | 78 (58.6%) | 55 (44.4%) |
| **Living arrangements** | Living alone | 35 (26.3%) | 38 (30.6%) |
| Living with friends | 41 (30.8%) | 50 (40.3%) |
| Living with partner and/or own children | 27 (20.3%) | 7 (5.6%) |
| Living with family of origin | 30 (22.6%) | 28 (22.6%) |
| Missing | 0 (0.0%) | 1 (0.8%) |
| **Maternal higher education** | No | 70 (52.6%) | 40 (32.3%) |
| Yes | 62 (46.6%) | 83 (66.9%) |
| Missing | 1 (0.8%) | 1 (0.8%) |

**Notes:** Values are mean (SD) for continuous variables and n (%) for categorical variables. Vigor, dedication, absorption, and overall academic engagement were scored on a 0-6 scale; partial examination average was scored on a 0-10 scale. Percentages were calculated using the column total for each final-examination data group. Missing values are shown where applicable. This comparison is descriptive and is intended to characterize the selected nature of the subset with final examination records; no formal hypothesis tests were conducted.

## Supplementary Table S5: Unadjusted associations between sociodemographic variables and academic outcomes

| **Predictor** | **Outcome** | **Model** | **Estimate (95% CI)** | **p-value** |
| --- | --- | --- | --- | --- |
| **Age (per year increase)** | Partial examination score | Linear regression | -0.08 (-0.11 to -0.05) | <0.001 |
| **Gender: male vs female** | Partial examination score | Linear regression | 0.30 (-0.15 to 0.74) | 0.194 |
| **Maternal higher education vs no higher education** | Partial examination score | Linear regression | 0.76 (0.36 to 1.16) | <0.001 |
| **Country-of-origin-based non-Spanish-speaking proxy vs Spanish-speaking** | Partial examination score | Linear regression | -0.55 (-1.08 to -0.03) | 0.040 |
| **Age (per year increase)** | Passing partial examination | Logistic regression | 0.90 (0.87 to 0.94) | <0.001 |
| **Gender: male vs female** | Passing partial examination | Logistic regression | 0.93 (0.64 to 1.37) | 0.726 |
| **Maternal higher education vs no higher education** | Passing partial examination | Logistic regression | 1.89 (1.34 to 2.68) | <0.001 |
| **Country-of-origin-based non-Spanish-speaking proxy vs Spanish-speaking** | Passing partial examination | Logistic regression | 0.55 (0.35 to 0.86) | 0.009 |

**Notes:** Unadjusted models were fitted separately for each predictor and outcome. Linear regression estimates represent differences in partial examination scores on a 0-10 scale. Logistic regression estimates are odds ratios for passing a partial examination. Reference categories for categorical predictors were female gender, no maternal higher education, and Spanish-speaking country-of-origin proxy.

## Supplementary Table S6: Exploratory mixed-effects model testing the nationality-by-assessment-context interaction

| **Predictor** | **Estimate (95% CI)** | **p-value** |
| --- | --- | --- |
| **Vigor (per unit increase)** | 0.13 (-0.06 to 0.32) | 0.189 |
| **Nationality: cross-border/international vs Argentine** | -1.10 (-1.67 to -0.52) | <0.001 |
| **Assessment context: written MCQ partial examination vs oral partial examination** | -0.86 (-1.25 to -0.47) | <0.001 |
| **Nationality x written MCQ assessment context** | 0.96 (0.42 to 1.50) | <0.001 |

**Notes:** Exploratory linear mixed-effects model with random intercept for student. The model included 555 observations nested within 227 students. Estimates represent adjusted differences in partial examination scores on a 0-10 scale. Reference categories were Argentine nationality and oral assessment context. Assessment context was structurally linked to subject: Embryology and Histology partial examinations were administered as oral examinations, whereas the Molecular Biology and Genetics partial examination was administered as a written multiple-choice examination. Therefore, this model should be interpreted as an exploratory assessment-context analysis rather than as evidence of an independent assessment-format effect. All p-values were two-sided and were not adjusted for multiple comparisons.

## Supplementary Table S7: Sensitivity analysis restricted to observations with survey response before the corresponding partial examination

| **Predictor** | **Estimate (95% CI)** | **p-value** |
| --- | --- | --- |
| **Vigor (per unit increase)** | 0.13 (-0.07 to 0.34) | 0.209 |
| **Cross-border/international vs Argentine** | -0.65 (-1.39 to 0.09) | 0.089 |
| **Living with friends vs living alone** | -0.36 (-1.13 to 0.42) | 0.368 |
| **Living with partner and/or own children vs living alone** | -0.99 (-2.00 to 0.03) | 0.057 |
| **Living with family of origin vs living alone** | -0.36 (-1.17 to 0.45) | 0.386 |
| **Histology vs Embryology** | -0.74 (-1.09 to -0.38) | <0.001 |
| **Molecular Biology and Genetics vs Embryology** | -0.76 (-1.10 to -0.42) | <0.001 |

**Notes:** Sensitivity analysis restricted to observations in which the survey response preceded the corresponding partial examination. Linear mixed-effects model with random intercept for student. The model included 483 observations nested within 216 students. Estimates represent adjusted differences in examination scores on a 0-10 scale. Reference categories for categorical predictors were Argentine nationality, living alone, and Embryology.

## Supplementary Table S8: Sensitivity analysis excluding students who completed at least one retake examination

| **Predictor** | **Estimate (95% CI)** | **p-value** |
| --- | --- | --- |
| **Vigor (per unit increase)** | 0.16 (-0.20 to 0.52) | 0.394 |
| **Cross-border/international vs Argentine** | -1.67 (-2.98 to -0.36) | 0.015 |
| **Living with friends vs living alone** | -0.49 (-1.80 to 0.82) | 0.467 |
| **Living with partner and/or own children vs living alone** | -1.88 (-3.40 to -0.36) | 0.018 |
| **Living with family of origin vs living alone** | -0.90 (-2.35 to 0.55) | 0.227 |
| **Histology vs Embryology** | -0.40 (-0.98 to 0.18) | 0.180 |
| **Molecular Biology and Genetics vs Embryology** | -1.59 (-2.15 to -1.03) | <0.001 |

**Notes:** Sensitivity analysis excluding students who completed at least one retake examination. Linear mixed-effects model with random intercept for student. The model included 177 subject-level observations nested within 77 students. Estimates represent adjusted differences in examination scores on a 0-10 scale. Reference categories for categorical predictors were Argentine nationality, living alone, and Embryology.

## Supplementary Table S9: Alternative mixed-effects model additionally adjusted for age, gender, and maternal higher education

| **Predictor** | **Estimate (95% CI)** | **p-value** |
| --- | --- | --- |
| **Vigor (per unit increase)** | 0.12 (-0.07 to 0.31) | 0.219 |
| **Cross-border/international vs Argentine** | -0.88 (-1.58 to -0.19) | 0.013 |
| **Living with friends vs living alone** | -0.28 (-1.02 to 0.46) | 0.462 |
| **Living with partner and/or own children vs living alone** | -0.57 (-1.51 to 0.36) | 0.228 |
| **Living with family of origin vs living alone** | -0.41 (-1.16 to 0.34) | 0.287 |
| **Age (per year increase)** | -0.07 (-0.11 to -0.03) | <0.001 |
| **Gender: male vs female** | 0.46 (-0.13 to 1.06) | 0.130 |
| **Maternal higher education vs no higher education** | 0.63 (0.10 to 1.16) | 0.021 |
| **Histology vs Embryology** | -0.67 (-1.01 to -0.34) | <0.001 |
| **Molecular Biology and Genetics vs Embryology** | -0.70 (-1.02 to -0.38) | <0.001 |

**Notes:** Alternative linear mixed-effects model with random intercept for student, additionally adjusted for age, gender, and maternal higher education. The model included 545 observations nested within 223 students. Estimates represent adjusted differences in examination scores on a 0-10 scale. Reference categories for categorical predictors were Argentine nationality, living alone, Embryology, female gender, and no maternal higher education.
